# Supplementary material
Source: Springer Nature journal article supplement (https://www.springermedizin.de/resource/supplementary/12939_2009_122_MOESM1_ESM.pdf/9551528)

Socioeconomic position

I

Specific risk factors  
or risk conditions

II

Health outcome or  
health behaviour

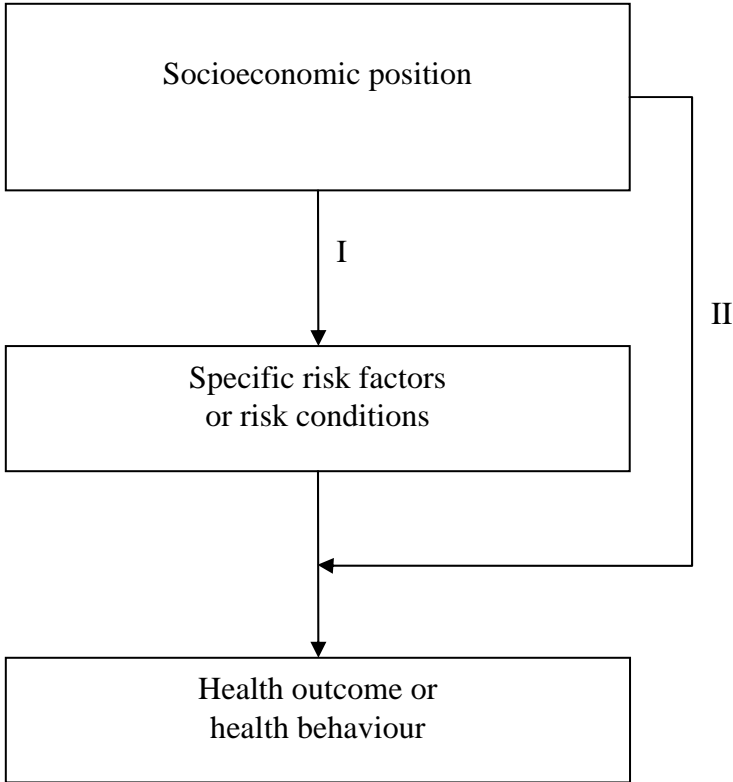

Supplement: MOESM1 [file 9551528]
